# Supplementary material for: The Effect of an Intervening Promoter Nucleosome on Gene Expression
Source: PLoS One. 2013 May 20;8(5):e63072. doi: 10.1371/journal.pone.0063072 (PMC3659125; doi:10.1371/journal.pone.0063072)
Supplement: Table S2 — The fitting parameters from our quantitative model. (DOCX) [file pone.0063072.s007.docx]

| Parameter | Explicit meaning | Implicit meaning |
| --- | --- | --- |
|  | Rise/fall threshold |  |
|  | Fall/rise threshold |  |
|  | Maximum value |  |
|  | Skewness |  |
